# Supplementary material for: RAGE-mediated functional DNA methylated modification contributes to cigarette smoke-induced airway inflammation in mice
Source: Oxford University Press journal article supplement (doi:10.1042/bsr20210308), 2021-05-21
Supplement: bsr-2021-0308_supp.pdf [file bsr-2021-0308_supp.pdf]

**Table S1. The 90 candidate genes selected according to the methylation and gene expression**

| Gene          | Description                                               | Genomic localization                      | Methylation change*    | Fold Change |
|---------------|-----------------------------------------------------------|-------------------------------------------|------------------------|-------------|
| 1600014C10Rik | RIKEN cDNA 1600014C10 gene                                | Promoter/Intron                           | Hypo/Hyper             | -1.3        |
| 2610035D17Rik | RIKEN cDNA 2610035D17 gene                                | Intron                                    | Inc                    | 1.3         |
| 2610528J11Rik | RIKEN cDNA 2610528J11 gene                                | Promoter/Distal Intergenic                | Hypo/Hypo              | -1.3        |
| Agpat4        | 1-acylglycerol-3-phosphate O-acyltransferase 4            | Intron                                    | Inc                    | -1.3        |
| Alox5ap       | arachidonate 5-lipoxygenase activating protein            | Promoter/Distal Intergenic/3' UTR         | Hyper/Hypo/Hypo        | -1.2        |
| Arhgap22      | Rho GTPase activating protein 22                          | Promoter                                  | Inc                    | -1.3        |
| Atoh8         | atonal bHLH transcription factor 8                        | Intron /Distal Intergenic                 | Hypo/Hypo              | -1.7        |
| Best2         | bestrophin 2                                              | 3' UTR                                    | Hypo                   | 1.2         |
| Blm           | Bloom syndrome, RecQ like helicase                        | Exon/3' UTR                               | Inc/Hypo               | -1.2        |
| Btg3          | B cell translocation gene 3                               | Intron/Distal Intergenic                  | Hyper/Hyper            | -1.6        |
| Cd80          | CD80 antigen                                              | Intron/Exon                               | Hypo/Hypo              | -1.3        |
| Cd84          | CD84 antigen                                              | Promoter /Intron/Distal Intergenic/3' UTR | Hyper/Hyper/Hyper/Hypo | 1.3         |
| Cdc6          | cell division cycle 6                                     | 3' UTR                                    | Hypo                   | -1.3        |
| Ceacam2       | carcinoembryonic antigen-related cell adhesion molecule 2 | Intron                                    | Hyper                  | 1.3         |
| Cebpb         | CCAAT/enhancer binding protein (C/EBP), beta              | Promoter/Intron                           | Hypo/Hyper             | -1.3        |
| Ckap4         | cytoskeleton-associated protein 4                         | Distal Intergenic                         | Hyper                  | -1.4        |
| Cxcl1         | chemokine (C-X-C motif) ligand 1                          | Promoter                                  | Hyper                  | -1.2        |
| Dmc1          | DNA meiotic recombinase 1                                 | Promoter                                  | Hypo                   | 1.2         |
| Dusp6         | dual specificity phosphatase 6                            | Exon/Distal Intergenic                    | Hyper/Hyper            | -1.7        |
| Ear1          | eosinophil-associated, ribonuclease A family, member 1    | Distal Intergenic                         | Hyper                  | 1.7         |
| Emilin2       | elastin microfibril interfacier 2                         | Exon/Intron/Downstream                    | Hyper/Inc/Hyper        | -1.5        |
| F2r           | coagulation factor II (thrombin) receptor                 | Exon/Distal Intergenic/Downstream         | Hyper/Hyper/Hyper      | -1.3        |

|          |                                                               |                            |             |      |
|----------|---------------------------------------------------------------|----------------------------|-------------|------|
| Fn1      | fibronectin 1                                                 | Exon/Distal Intergenic     | Hyper/Hypo  | -1.7 |
| Galnt15  | polypeptide N-acetylgalactosaminyltransferase 15              | Promoter                   | Hypo        | -1.3 |
| Galnt2   | polypeptide N-acetylgalactosaminyltransferase 2               | Intron                     | Hyper       | -1.3 |
| Galnt9   | polypeptide N-acetylgalactosaminyltransferase 9               | Intron                     | Inc         | -1.3 |
| Gclc     | glutamate-cysteine ligase, catalytic subunit                  | Distal Intergenic          | Hypo        | 1.6  |
| Gdf10    | growth differentiation factor 10                              | Intron                     | Hyper       | -1.3 |
| Gm3696   | predicted gene 3696                                           | Intron                     | Hyper       | 1.6  |
| Gm5148   | predicted gene 5148                                           | Distal Intergenic          | Inc         | -1.2 |
| Gm6548   | eukaryotic translation elongation factor 1 alpha 1 pseudogene | Promoter                   | Hyper       | 1.3  |
| Gm8300   | predicted gene 8300                                           | Distal Intergenic          | Hyper       | 1.6  |
| Gp6      | glycoprotein 6 (platelet)                                     | Distal Intergenic          | Hyper       | -1.2 |
| Gsg11    | GSG1-like                                                     | Promoter                   | Hyper       | 1.2  |
| Ifitm2   | interferon induced transmembrane protein 2                    | Promoter                   | Hypo        | -1.5 |
| Inf2     | inverted formin, FH2 and WH2 domain containing                | Promoter/Distal Intergenic | Hyper/Hyper | -1.2 |
| Irak3    | interleukin-1 receptor-associated kinase 3                    | Intron                     | Inc         | -1.3 |
| Kcnj8    | potassium inwardly-rectifying channel, subfamily J, member 8  | Distal Intergenic          | Inc         | -1.3 |
| Kdr      | kinase insert domain protein receptor                         | Exon/Distal Intergenic     | Hyper/Hypo  | 1.4  |
| Krt18    | keratin 18                                                    | Promoter/Distal Intergenic | Hypo/Hypo   | -1.5 |
| Ldb2     | LIM domain binding 2                                          | Intron                     | Hyper       | -1.2 |
| Lgi2     | leucine-rich repeat LGI family, member 2                      | Distal Intergenic          | Hypo        | -1.2 |
| Lmb1     | lamin B1                                                      | Distal Intergenic          | Hyper       | -1.2 |
| Ly86     | lymphocyte antigen 86                                         | Exon/Distal Intergenic     | Hyper/Hypo  | -1.2 |
| Map3k7c1 | Map3k7 C-terminal like                                        | Distal Intergenic          | Hyper       | -1.3 |
| Mctp1    | multiple C2 domains, transmembrane 1                          | Intron                     | Hyper       | -1.5 |

|          |                                                                         |                               |                   |      |
|----------|-------------------------------------------------------------------------|-------------------------------|-------------------|------|
| Mir1981  | microRNA 1981                                                           | Promoter                      | Hypo              | 1.2  |
| Mmp25    | matrix metalloproteinase 25                                             | Promoter                      | Inc               | -1.4 |
| Mthfd1l  | methylenetetrahydrofolate dehydrogenase (NADP+ Dependent) 1 Like        | Exon                          | Hypo              | -1.4 |
| Myo18b   | myosin XVIIIb                                                           | Intron/Exon                   | Hypo/Hypo         | 1.2  |
| Nav2     | neuron navigator 2                                                      | Intron                        | Inc               | 1.2  |
| Ncf1     | neutrophil cytosolic factor 1                                           | Intron/3' UTR                 | Hypo/Hypo         | -1.3 |
| Ntrk2    | neurotrophic tyrosine kinase, receptor, type 2                          | Intron                        | Hypo              | -1.6 |
| Nup12    | nucleoporin like 2                                                      | Intron                        | Hyper             | 1.3  |
| Osm      | oncostatin M                                                            | Promoter                      | Hyper             | -1.4 |
| Padi4    | peptidyl arginine deiminase, type IV                                    | Exon/Downstream               | Hyper/Hypo        | -1.6 |
| Pgam2    | phosphoglycerate mutase 2                                               | Promoter                      | Hyper             | 1.3  |
| Pgm1     | phosphoglucomutase 1                                                    | Exon/Distal Intergenic        | Hyper/Hyper       | -1.4 |
| Pln      | phospholamban                                                           | Distal Intergenic             | Hyper             | 1.5  |
| Ppargc1a | peroxisome proliferative activated receptor, gamma, coactivator 1 alpha | Distal Intergenic             | Hypo              | -1.3 |
| Prkar2b  | protein kinase, cAMP dependent regulatory, type II beta                 | Intron/Exon/Distal Intergenic | Hyper/Hyper/Hyper | 1.4  |
| Psmb9    | proteasome 20S subunit beta 9                                           | Promoter                      | Hyper             | -1.3 |
| Pttg1    | pituitary tumor-transforming gene 1                                     | Promoter                      | Hyper             | 1.3  |
| Rcsd1    | RCS domain containing 1                                                 | Distal Intergenic             | Hypo              | -1.2 |
| Rerg     | RAS-like, estrogen-regulated, growth-inhibitor                          | Promoter/Intron               | Hypo/Hyper        | -1.2 |
| Rfc5     | replication factor C (activator 1) 5                                    | Distal Intergenic             | Hyper             | -1.3 |
| Rnaseh2b | ribonuclease H2, subunit B                                              | Promoter                      | Hyper             | -1.3 |
| Rps9     | ribosomal protein S9                                                    | Promoter /Distal Intergenic   | Hyper/Hypo        | 1.3  |
| Rrm2     | ribonucleotide reductase M2                                             | Exon/Distal Intergenic        | Hyper/Hyper       | -1.3 |
| Slc16a6  | Solute Carrier Family 16 Member 6                                       | Promoter/Intron               | Hyper/Hyper       | -1.2 |

|          |                                                       |                           |                  |      |
|----------|-------------------------------------------------------|---------------------------|------------------|------|
| Slc1a5   | solute carrier family 1 member 5                      | Exon/Distal Intergenic    | Inc/Hyper        | 1.3  |
| Slc7a5   | solute carrier family 7 member 5                      | Distal Intergenic         | Hyper            | -1.5 |
| Slc7a8   | solute carrier family 7 member 8                      | Intron/Distal Intergenic  | Hyper/Hyper      | -1.3 |
| Socs3    | suppressor of cytokine signaling 3                    | Distal Intergenic         | Hyper            | -1.6 |
| Spata18  | spermatogenesis associated 18                         | Distal Intergenic         | Inc              | 1.5  |
| Srgn     | serglycin                                             | Promoter                  | Hyper            | -1.3 |
| Srp9     | signal recognition particle 9                         | Intron/Distal Intergenic  | Hyper/Inc        | -1.2 |
| St3gal1  | ST3 beta-galactoside alpha-2,3-sialyltransferase 1    | Intron /Distal Intergenic | Hyper/Hyper      | -1.2 |
| Tbc1d30  | TBC1 domain family, member 30                         | Promoter/Exon/3' UTR      | Hyper/Hypo/Hyper | 1.2  |
| Thy1     | thymus cell antigen 1, theta                          | Promoter                  | Hypo             | -1.3 |
| Timm22   | translocase of inner mitochondrial membrane 22        | Intron/Exon               | Hypo/Hypo        | -1.4 |
| Tlr6     | toll-like receptor 6                                  | Promoter                  | Hyper            | -1.4 |
| Tmem45b  | transmembrane protein 45b                             | Distal Intergenic         | Inc              | 1.5  |
| Tmod2    | tropomodulin 2                                        | Promoter                  | Hypo             | 1.3  |
| Tnfrsf1a | tumor necrosis factor receptor superfamily, member 1a | 3' UTR                    | Hypo             | -1.2 |
| Vasp     | vasodilator-stimulated phosphoprotein                 | Downstream                | Hyper            | -1.3 |
| Vmn2r33  | vomer nasal 2, receptor 33                            | Distal Intergenic         | Hyper            | 1.6  |
| Wfs1     | wolframin ER transmembrane glycoprotein               | Intron                    | Hyper            | -1.3 |
| Zbp1     | Z-DNA binding protein 1                               | Intron                    | Hypo             | -1.3 |
| Zbtb20   | zinc finger and BTB domain containing 20              | Intron                    | Hypo             | 1.3  |

---

\*Methylation changes with fold changes in gene expression by CS+KO vs CS+WT. Hyper, hypermethylation; Hypo, hypomethylated; Inc, increased variance.

**Table S2.** GO enrichment analysis (the functional methylated genes marked red)

| Cellular component/Biologic process/Molecular function | Genes                                                                                                               | Count | P value     |
|--------------------------------------------------------|---------------------------------------------------------------------------------------------------------------------|-------|-------------|
| regulation of MAPK cascade                             | <b>Osm, Tlr6</b> , Irak3, F2r, Fn1, Gdf10, Ncf1, Lmnb1, Map3k7cl, Kdr, Dusp6, Ntrk2                                 | 12    | 1.40729E-05 |
| regulation of interleukin-6 production                 | <b>Tlr6</b> , F2r, Zbtb20, Cebpb, Irak3                                                                             | 5     | 2.34084E-05 |
| MAPK cascade                                           | <b>Osm, Tlr6</b> , Irak3, F2r, Map3k7cl, Fn1, Ncf1, Kdr, Gdf10, Dusp6, Ntrk2, Lmnb1                                 | 12    | 3.43092E-05 |
| inflammatory response                                  | <b>Cxcl1, Alox5ap, Mmp25, Tlr6</b> , F2r, Tnfrsf1a, Ly86, Fn1, Ncf1, Socs3                                          | 10    | 9.48037E-05 |
| defense response                                       | <b>Tlr6, Mmp25, Cxcl1, Alox5ap</b> , Padi4, Kcnj8, F2r, Zbp1, Socs3, Tnfrsf1a, Ly86, Fn1, Ncf1, Cebpb, rak3, Ifitm2 | 16    | 0.000251799 |
| positive regulation of MAPK cascade                    | <b>Osm, Tlr6</b> , F2r, Lmnb1, Map3k7cl, Kdr, Ncf1, Ntrk2                                                           | 8     | 0.000312195 |
| response to cytokine                                   | <b>Cxcl1, Osm</b> , Ppargc1a, Ifitm2, Zbp1, Irak3, Cebpb, Krt18, Tnfrsf1a, Gclc, Socs3                              | 11    | 0.000511441 |
| negative regulation of cytokine production             | <b>Tlr6, Srgn</b> , Irak3, Cd84, Fn1                                                                                | 5     | 0.000563016 |
| cytokine-mediated signaling pathway                    | <b>Cxcl1, Osm</b> , Irak3, Zbp1, Socs3, Tnfrsf1a, Krt18                                                             | 7     | 0.000723893 |
| regulation of cytokine production                      | <b>Srgn, Tlr6</b> , F2r, Irak3, Cd84, Fn1, Cebpb, Zbtb20                                                            | 8     | 0.001398345 |
| regulation of cytokine secretion                       | <b>Srgn, Tlr6</b> , Fn1, F2r                                                                                        | 4     | 0.001544646 |
| cellular response to cytokine stimulus                 | <b>Cxcl1, Osm</b> , Socs3, Krt18, Tnfrsf1a, Cebpb, Ppargc1a, Zbp1, Irak3                                            | 9     | 0.002115125 |
| cytokine secretion                                     | <b>Tlr6, Srgn</b> , Fn1, F2r                                                                                        | 4     | 0.002629006 |
| cytokine production                                    | <b>Tlr6, Srgn</b> , Irak3, Cd84, F2r, Cebpb, Fn1,                                                                   | 8     | 0.002833485 |

|                                              | Zbtb20                                                                                                                          |    |             |  |
|----------------------------------------------|---------------------------------------------------------------------------------------------------------------------------------|----|-------------|--|
| regulation of MAP kinase activity            | Tlr6, F2r, Irak3, Map3k7cl, Dusp6                                                                                               | 5  | 0.002862216 |  |
| immune system process                        | Psmb9, Tlr6, Cxcl1, Osm, Galnt2, Kcnj8,<br>Zbp1, Tnfrsf1a, Ncf1, Padi4, Cd80,<br>Cd84, Thy1, Blm, Irak3, Ifitm2, Ly86,<br>Cebpb | 18 | 0.008472928 |  |
| negative regulation of immune system process | Tlr6, Cd84, Irak, Thy1, Cebpb                                                                                                   | 5  | 0.015585279 |  |
| positive regulation of immune system process | Tlr6, Cxcl1, Cd80, Blm, Cd84, Irak3,<br>Zbp1, Thy1                                                                              | 8  | 0.024008534 |  |
| immune response                              | Osm, Tlr6, Cxcl1, Tnfrsf1a, Ly86, Ifitm2,<br>Irak3, Padi4, Thy1, Zbp1, Cd84                                                     | 11 | 0.031630554 |  |

---

**Table S3 KEGG enrichment analysis**

| Pathways                             | Count | Genes                                 | P value |
|--------------------------------------|-------|---------------------------------------|---------|
| TNF signaling pathway                | 4     | <b>Cxcl1</b> , Socs3, Tnfrsf1a, Cebpb | 0.00164 |
| DNA replication                      | 2     | <b>Rnaseh2b</b> , Rfc5                | 0.00333 |
| IL-17 signaling pathway              | 2     | <b>Cxcl1</b> , Cebpb                  | 0.04311 |
| Toll-like receptor signaling pathway | 2     | <b>Tlr6</b> , Cd80                    | 0.05491 |

(the functional methylated genes marked red)
